# Supplementary material for: Radiocarbon Production Events and their Potential Relationship with the Schwabe Cycle
Source: Springer Nature journal article supplement (doi:10.1038/s41598-019-53296-x), 2019-11-19
Supplement: 41598_2019_53296_MOESM1_ESM.pdf [file 41598_2019_53296_MOESM1_ESM.pdf]

# Radiocarbon Production Events and their Potential Relationship with the Schwabe Cycle - *SUPPLEMENTARY INFORMATION*

Scifo A., Kuitens M., Neocleous A., Pope B.J.S., Miles D., Jansma E., Doeve P., Smith A. M., Miyake F. & Dee M. W.

## S1 – RAW DATA (NEWLY MEASURED)

| Sample type      | Sample number (GrM) | Calendar age (year CE) | <sup>14</sup> C age (year BP) | Δ <sup>14</sup> C (‰) | Averaged <sup>14</sup> C age (year BP) | Averaged Δ <sup>14</sup> C (‰) |
|------------------|---------------------|------------------------|-------------------------------|-----------------------|----------------------------------------|--------------------------------|
| A (Oak)          | 13331               | 1853                   | 124 ± 15                      | -3.70 ± 1.86          | 126 ± 11                               | -3.94 ± 1.36                   |
|                  | 13404               |                        | 129 ± 16                      | -4.32 ± 2.01          |                                        |                                |
| Mapledurham (UK) | 13332               | 1855                   | 137 ± 16                      | -5.54 ± 2.01          | 137 ± 16                               | -5.54 ± 1.98                   |
|                  | 13334               | 1856                   | 169 ± 16                      | -9.62 ± 2.00          | 149 ± 11                               | -7.03 ± 1.36                   |
|                  | 16797               |                        | 131 ± 15                      | -4.92 ± 1.86          |                                        |                                |
|                  | 12714               | 1857                   | 119 ± 13                      | -3.56 ± 1.55          | 119 ± 12                               | -3.56 ± 1.49                   |
|                  | 12715               | 1858                   | 111 ± 13                      | -2.68 ± 1.55          | 111 ± 12                               | -2.68 ± 1.49                   |
|                  | 12716               | 1859                   | 142 ± 13                      | -6.64 ± 1.55          | 144 ± 8                                | -6.89 ± 0.99                   |
|                  | 16798               |                        | 153 ± 14                      | -8.00 ± 1.70          |                                        |                                |
|                  | 18107               |                        | 138 ± 13                      | -6.15 ± 1.85          |                                        |                                |
|                  | 12717               | 1860                   | 114 ± 13                      | -3.30 ± 1.55          | 130 ± 10                               | -5.03 ± 1.24                   |
|                  | 13335               |                        | 153 ± 16                      | -8.12 ± 2.00          |                                        |                                |
|                  | 12719               | 1861                   | 145 ± 13                      | -7.25 ± 1.54          | 145 ± 12                               | -7.25 ± 1.48                   |
|                  | 12721               | 1862                   | 127 ± 11                      | -5.15 ± 1.39          | 132 ± 8                                | -5.89 ± 1.11                   |
|                  | 12727               |                        | 140 ± 13                      | -6.76 ± 1.55          |                                        |                                |
|                  | 12722               | 1863                   | 158 ± 13                      | -9.10 ± 1.54          | 158 ± 12                               | -9.10 ± 1.48                   |
|                  | 13336               | 1864                   | 146 ± 15                      | -7.74 ± 1.85          | 140 ± 11                               | -7.00 ± 1.36                   |
|                  | 13405               |                        | 134 ± 16                      | -6.26 ± 2.01          |                                        |                                |
| 12725            | 1865                | 139 ± 11               | -6.99 ± 1.39                  | 137 ± 8               | -6.75 ± 1.11                           |                                |

|  |       |      |          |              |          |              |
|--|-------|------|----------|--------------|----------|--------------|
|  | 12729 |      | 135 ± 13 | -6.50 ± 1.55 |          |              |
|  | 12726 | 1866 | 119 ± 13 | -4.64 ± 1.55 | 119 ± 12 | -4.64 ± 1.48 |

| <i>Sample type</i>  | <i>Sample number (GrM)</i> | <i>Calendar age (year CE)</i> | <i><sup>14</sup>C age (year BP)</i> | <i>Δ<sup>14</sup>C (‰)</i> | <i>Averaged <sup>14</sup>C age (year BP)</i> | <i>Averaged Δ<sup>14</sup>C (‰)</i> |
|---------------------|----------------------------|-------------------------------|-------------------------------------|----------------------------|----------------------------------------------|-------------------------------------|
| B1 (Juniper)        | 16801                      | 756                           | 1350 ± 15                           | -23.35 ± 1.82              | 1350 ± 15                                    | -23.35 ± 1.82                       |
|                     | 16803                      | 758                           | 1344 ± 15                           | -22.86 ± 1.82              | 1344 ± 15                                    | -22.86 ± 1.82                       |
|                     | 16804                      | 759                           | 1360 ± 25                           | -24.92 ± 3.03              | 1360 ± 25                                    | -24.92 ± 3.03                       |
|                     | 16805                      | 762-763                       | 1305 ± 16                           | -18.63 ± 1.95              | 1305 ± 16                                    | -18.63 ± 1.95                       |
| Sierra Nevada (USA) | 16806                      | 765                           | 1316 ± 16                           | -20.27 ± 1.95              | 1316 ± 16                                    | -20.27 ± 1.95                       |
|                     | 16809                      | 766                           | 1311 ± 15                           | -19.78 ± 1.83              | 1311 ± 15                                    | -19.78 ± 1.83                       |
|                     | 16810                      | 768                           | 1324 ± 16                           | -21.61 ± 1.95              | 1324 ± 16                                    | -21.61 ± 1.95                       |
|                     | 16811                      | 769                           | 1308 ± 15                           | -19.77 ± 1.83              | 1308 ± 15                                    | -19.77 ± 1.83                       |
|                     | 16812                      | 771                           | 1326 ± 24                           | -22.20 ± 2.92              | 1326 ± 24                                    | -22.20 ± 2.92                       |
|                     | 16813                      | 772                           | 1320 ± 18                           | -21.59 ± 2.19              | 1320 ± 18                                    | -21.59 ± 2.19                       |
|                     | 16814                      | 774                           | 1261 ± 16                           | -14.62 ± 1.96              | 1291 ± 12                                    | -18.29 ± 1.47                       |
|                     | 17197                      |                               | 1333 ± 19                           | -23.41 ± 2.31              |                                              |                                     |
|                     | 16815                      | 775                           | 1172 ± 16                           | -3.76 ± 1.98               | 1172 ± 16                                    | -3.76 ± 1.98                        |
|                     | 16816                      | 777                           | 1193 ± 16                           | -6.60 ± 1.98               | 1177 ± 11                                    | -4.62 ± 1.36                        |
|                     | 17198                      |                               | 1161 ± 16                           | -2.64 ± 1.98               |                                              |                                     |

| <i>Sample type</i> | <i>Sample number (GrM)</i> | <i>Calendar age (year CE)</i> | <i><sup>14</sup>C age (year BP)</i> | <i>Δ<sup>14</sup>C (‰)</i> | <i>Averaged <sup>14</sup>C age (year BP)</i> | <i>Averaged Δ<sup>14</sup>C (‰)</i> |
|--------------------|----------------------------|-------------------------------|-------------------------------------|----------------------------|----------------------------------------------|-------------------------------------|
| B2 (Oak)           | 11849                      | 770                           | 1314 ± 17.5                         | -20.62 ± 2.13              | 1290 ± 7                                     | -17.72 ± 0.86                       |
|                    | 12731                      |                               | 1286 ± 14                           | -17.2 ± 1.68               |                                              |                                     |
|                    | 12786                      |                               | 1276 ± 16                           | -15.98 ± 1.99              |                                              |                                     |
|                    | 14094                      |                               | 1290 ± 11                           | -17.69 ± 1.38              |                                              |                                     |
| Dorestad (NL)      | 10567                      | 771                           | 1312 ± 22.5                         | -20.5 ± 2.74               | 1278 ± 12                                    | -16.32 ± 1.45                       |
|                    | 11774                      |                               | 1267 ± 15                           | -15 ± 1.84                 |                                              |                                     |
|                    | 12686                      |                               | 1250 ± 37.5                         | -12.91 ± 4.61              |                                              |                                     |
|                    | 10568                      | 772                           | 1295 ± 22.5                         | -18.54 ± 2.75              | 1281 ± 6                                     | -16.87 ± 0.76                       |
|                    | 12179                      |                               | 1286 ± 14                           | -17.44 ± 1.68              |                                              |                                     |
|                    | 12737                      |                               | 1266 ± 14                           | -14.99 ± 1.69              |                                              |                                     |
|                    | 12739                      |                               | 1271 ± 14                           | -15.61 ± 1.68              |                                              |                                     |
|                    | 14093                      | 773                           | 1292 ± 11                           | -18.18 ± 1.38              | 1308 ± 11                                    | -20.20 ± 1.39                       |
|                    | 10569                      |                               | 1315 ± 22.5                         | -21.1 ± 2.74               |                                              |                                     |
|                    | 13095                      |                               | 1312 ± 19                           | -20.73 ± 2.29              |                                              |                                     |
|                    | 13096                      | 774                           | 1298 ± 19                           | -19.03 ± 2.29              | 1285 ± 25                                    | -17.56 ± 3.06                       |
|                    | 10570                      |                               | 1285 ± 25                           | -17.56 ± 3.06              |                                              |                                     |
|                    | 10572                      | 775                           | 1205 ± 25                           | -7.84 ± 3.09               | 1211 ± 15                                    | -8.63 ± 1.85                        |
|                    | 17405                      |                               | 1215 ± 19                           | -9.08 ± 2.31               |                                              |                                     |
|                    | 10574                      | 776                           | 1125 ± 25                           | 1.97 ± 3.12                | 1142 ± 15                                    | -0.19 ± 1.87                        |
|                    | 13098                      |                               | 1152 ± 19                           | -1.4 ± 2.33                |                                              |                                     |
| 10575              | 777                        | 1165 ± 25                     | -3.13 ± 3.1                         | 1153 ± 14                  | -1.65 ± 1.69                                 |                                     |

|  |       |     |           |              |           |              |
|--|-------|-----|-----------|--------------|-----------|--------------|
|  | 14839 |     | 1148 ± 16 | -1.02 ± 2.02 |           |              |
|  | 10577 | 778 | 1170 ± 25 | -3.87 ± 3.1  | 1168 ± 10 | -3.66 ± 1.25 |
|  | 14440 |     | 1173 ± 15 | -4.25 ± 1.86 |           |              |
|  | 15240 |     | 1162 ± 16 | -2.88 ± 2.02 |           |              |
|  | 10578 | 779 | 1170 ± 25 | -3.99 ± 3.1  | 1176 ± 14 | -4.78 ± 1.69 |
|  | 13460 |     | 1179 ± 16 | -5.11 ± 2.01 |           |              |

| Sample type         | Sample number (GrM) | Calendar age (year CE) | <sup>14</sup> C age (year BP) | Δ <sup>14</sup> C (‰) | Averaged <sup>14</sup> C age (year BP) | Averaged Δ <sup>14</sup> C (‰) |
|---------------------|---------------------|------------------------|-------------------------------|-----------------------|----------------------------------------|--------------------------------|
| C (Juniper)         | 16818               | 976                    | 1136 ± 15                     | -23.32 ± 1.82         | 1136 ± 15                              | -23.32 ± 1.82                  |
|                     | 16819               | 978                    | 1108 ± 15                     | -20.15 ± 1.82         | 1108 ± 15                              | -20.15 ± 1.82                  |
| Sierra Nevada (USA) | 16820               | 980                    | 1113 ± 18                     | -20.99 ± 2.19         | 1113 ± 18                              | -20.99 ± 2.19                  |
|                     | 16821               | 982                    | 1143 ± 16                     | -24.88 ± 1.94         | 1143 ± 16                              | -24.88 ± 1.94                  |
|                     | 17189               | 984                    | 1120 ± 16                     | -22.32 ± 1.94         | 1120 ± 16                              | -22.32 ± 1.94                  |
|                     | 17190               | 986                    | 1101 ± 16                     | -20.24 ± 1.95         | 1102 ± 11                              | -20.36 ± 1.34                  |
|                     | 17201               |                        | 1102 ± 16                     | -20.36 ± 1.95         |                                        |                                |
|                     | 17191               | 988                    | 1116 ± 18                     | -22.31 ± 2.19         | 1116 ± 18                              | -22.31 ± 2.19                  |
|                     | 17192               | 989-991                | 1105 ± 19                     | -21.20 ± 2.31         | 1096 ± 12                              | -20.11 ± 1.46                  |
|                     | 17202               |                        | 1089 ± 16                     | -19.25 ± 1.95         |                                        |                                |
|                     | 17193               | 993                    | 1047 ± 16                     | -14.47 ± 1.96         | 1047 ± 16                              | -14.47 ± 1.96                  |
|                     | 17195               | 995                    | 1035 ± 16                     | -13.23 ± 1.96         | 1035 ± 16                              | -13.23 ± 1.96                  |
|                     | 17196               | 997                    | 1045 ± 16                     | -14.70 ± 1.96         | 1045 ± 16                              | -14.70 ± 1.96                  |

Table S1a, S1b, S1c, S1d. Raw radiocarbon measurements, expressed as <sup>14</sup>C age and Δ<sup>14</sup>C

## **S2 – RAW DATA (PREVIOUSLY PUBLISHED)**

| Event-775 (Miyake et al., 2013) |                       |       |
|---------------------------------|-----------------------|-------|
| Calendar age (year CE)          | Δ <sup>14</sup> C (‰) | ± (‰) |
| 730                             | -11.8                 | 2.1   |
| 732                             | -14.5                 | 2.1   |
| 734                             | -10.4                 | 2.1   |
| 736                             | -10.6                 | 2.6   |
| 738                             | -13.2                 | 2.1   |

|     |       |     |
|-----|-------|-----|
| 740 | -12.8 | 2.1 |
| 742 | -17.9 | 2.1 |
| 744 | -13.6 | 2.2 |
| 746 | -15.3 | 2.1 |
| 748 | -15.9 | 2.6 |
| 750 | -16.0 | 1.8 |
| 752 | -17.5 | 2.0 |
| 754 | -20.4 | 2.0 |
| 756 | -20.9 | 2.0 |
| 758 | -18.0 | 2.0 |
| 760 | -17.9 | 2.0 |

| <b>Event-994 (Miyake et al., 2013)</b>   |                                                 |                                 |
|------------------------------------------|-------------------------------------------------|---------------------------------|
| <b><i>Calendar age<br/>(year CE)</i></b> | <b><math>\Delta^{14}\text{C}</math><br/>(‰)</b> | <b><math>\pm</math><br/>(‰)</b> |
| 988                                      | -21.9                                           | 1.8                             |
| 989                                      | -20.2                                           | 1.9                             |
| 989                                      | -21.3                                           | 1.8                             |
| 990                                      | -25.3                                           | 2.9                             |
| 990                                      | -22.5                                           | 1.7                             |
| 991                                      | -21.5                                           | 1.5                             |
| 991                                      | -23.1                                           | 1.9                             |
| 992                                      | -22.8                                           | 2.0                             |
| 992                                      | -24.4                                           | 1.9                             |
| 993                                      | -20.7                                           | 1.6                             |
| 993                                      | -25.3                                           | 1.7                             |
| 994                                      | -11.5                                           | 2.0                             |
| 994                                      | -14.0                                           | 1.8                             |
| 995                                      | -12.9                                           | 1.5                             |
| 995                                      | -18.1                                           | 1.7                             |
| 996                                      | -11.3                                           | 2.0                             |
| 996                                      | -16.7                                           | 1.7                             |
| 997                                      | -14.2                                           | 2.0                             |
| 997                                      | -16.4                                           | 1.7                             |
| 998                                      | -15.3                                           | 2.0                             |
| 999                                      | -13.3                                           | 1.6                             |
| 1001                                     | -15.0                                           | 2.9                             |
| 1003                                     | -17.0                                           | 2.6                             |
| 1005                                     | -13.8                                           | 2.6                             |
| 1007                                     | -21.1                                           | 2.6                             |
| 1009                                     | -20.1                                           | 2.6                             |
| 1011                                     | -23.0                                           | 2.6                             |
| 1013                                     | -20.5                                           | 2.6                             |
| 1015                                     | -17.9                                           | 2.6                             |
| 1017                                     | -20.8                                           | 2.1                             |
| 1019                                     | -22.0                                           | 2.1                             |

|      |       |     |
|------|-------|-----|
| 1021 | -19.2 | 3.6 |
|------|-------|-----|

| <b>Event-994 (Menjo et al., 2005)</b> |                              |              |
|---------------------------------------|------------------------------|--------------|
| <i>Calendar age<br/>(year CE)</i>     | $\Delta^{14}\text{C}$<br>(‰) | $\pm$<br>(‰) |
| 996                                   | -14.35                       | 2.55         |
| 998                                   | -16.59                       | 2.55         |
| 1000                                  | -15.90                       | 2.55         |
| 1001                                  | -15.33                       | 2.55         |
| 1002                                  | -15.35                       | 2.55         |
| 1003                                  | -18.36                       | 2.55         |
| 1004                                  | -16.78                       | 2.55         |
| 1005                                  | -19.28                       | 2.55         |
| 1006                                  | -18.96                       | 2.55         |
| 1007                                  | -18.64                       | 2.55         |
| 1008                                  | -20.42                       | 1.90         |
| 1009                                  | -20.47                       | 1.88         |
| 1010                                  | -16.98                       | 1.99         |
| 1011                                  | -19.69                       | 1.98         |
| 1012                                  | -16.50                       | 1.98         |
| 1013                                  | -15.27                       | 1.99         |
| 1014                                  | -18.54                       | 2.82         |
| 1015                                  | -12.13                       | 2.82         |
| 1016                                  | -16.98                       | 2.82         |
| 1017                                  | -14.19                       | 2.82         |
| 1018                                  | -19.03                       | 2.55         |
| 1019                                  | -14.35                       | 3.20         |
| 1020                                  | -22.97                       | 3.20         |
| 1022                                  | -20.79                       | 3.20         |
| 1024                                  | -14.28                       | 2.14         |

| <b>Event-994 (Damon et al., 1995)</b> |                              |              |
|---------------------------------------|------------------------------|--------------|
| <i>Calendar age<br/>(year CE)</i>     | $\Delta^{14}\text{C}$<br>(‰) | $\pm$<br>(‰) |
| 1004                                  | -14.6                        | 3.9          |
| 1005                                  | -18.7                        | 4.0          |
| 1006                                  | -21.8                        | 4.0          |
| 1007                                  | -19.3                        | 3.7          |
| 1008                                  | -21.1                        | 3.4          |
| 1009                                  | -22.2                        | 3.8          |
| 1010                                  | -15.2                        | 3.3          |
| 1011                                  | -10.00                       | 3.5          |
| 1012                                  | -17.1                        | 3.3          |
| 1013                                  | -11.1                        | 3.2          |

|      |       |     |
|------|-------|-----|
| 1014 | -16.7 | 3.0 |
| 1015 | -11.8 | 4.1 |
| 1016 | -18.3 | 3.4 |

| Event-994 (Dee et al., 2016) |                              |              |
|------------------------------|------------------------------|--------------|
| Calendar age<br>(year CE)    | $\Delta^{14}\text{C}$<br>(‰) | $\pm$<br>(‰) |
| 1004                         | -13.20                       | 3.45         |
| 1005                         | -23.59                       | 3.41         |
| 1006                         | -12.46                       | 3.20         |
| 1007                         | -17.48                       | 3.80         |
| 1008                         | -23.58                       | 3.41         |
| 1009                         | -24.55                       | 3.53         |
| 1010                         | -16.25                       | 3.80         |

Table S2a, S2b, S2c, S2d, S2e. Previously published  $^{14}\text{C}$  measurements, expressed in  $\Delta^{14}\text{C}$ , utilized for the study of Event-775 and Event-994.

### S3 – DUPLICATES AND CHI SQUARED TEST

| Calendar year<br>(year CE) | Sample name             | $^{14}\text{C}$ age<br>(year BP) | Uncertainty<br>(year BP) | T-Statistic  | Chi-Square Test |
|----------------------------|-------------------------|----------------------------------|--------------------------|--------------|-----------------|
| <b>Sample A</b>            |                         |                                  |                          |              |                 |
| 1853                       | GrM-13331               | 124                              | 15                       | 0.024        | Pass            |
|                            | GrM-13404               | 129                              | 16                       | 0.028        |                 |
|                            | <b>Weighted Average</b> | <b>126</b>                       | <b>11</b>                | <b>0.052</b> |                 |
| 1856                       | GrM-13334               | 169                              | 16                       | 1.598        | Pass            |
|                            | GrM-16797               | 131                              | 15                       | 1.404        |                 |
|                            | <b>Weighted Average</b> | <b>149</b>                       | <b>11</b>                | <b>3.002</b> |                 |
| 1859                       | GrM-12716               | 142                              | 13                       | 0.022        | Pass            |
|                            | GrM-16798               | 153                              | 14                       | 0.421        |                 |
|                            | GrM-18107               | 138                              | 13                       | 0.207        |                 |
|                            | <b>Weighted Average</b> | <b>147</b>                       | <b>10</b>                | <b>0.650</b> |                 |
| 1860                       | GrM-12717               | 114                              | 13                       | 1.423        | Pass            |
|                            | GrM-13335               | 153                              | 16                       | 2.156        |                 |
|                            | <b>Weighted Average</b> | <b>130</b>                       | <b>10</b>                | <b>3.579</b> |                 |
| 1862                       | GrM-12721               | 127                              | 11                       | 0.243        | Pass            |
|                            | GrM-12727               | 140                              | 13                       | 0.340        |                 |
|                            | <b>Weighted Average</b> | <b>132</b>                       | <b>8</b>                 | <b>0.583</b> |                 |
| 1864                       | GrM-13336               | 146                              | 15                       | 0.140        | Pass            |
|                            | GrM-13405               | 134                              | 16                       | 0.159        |                 |
|                            | <b>Weighted Average</b> | <b>140</b>                       | <b>11</b>                | <b>0.299</b> |                 |
| 1865                       | GrM-12725               | 139                              | 11                       | 0.023        | Pass            |
|                            | GrM-12729               | 135                              | 13                       | 0.032        |                 |
|                            | <b>Weighted Average</b> | <b>137</b>                       | <b>8</b>                 | <b>0.055</b> |                 |
| <b>Sample B1</b>           |                         |                                  |                          |              |                 |
| 774                        | GrM-16814               | 1261                             | 16                       | 3.486        | Fail            |
|                            | GrM-17197               | 1333                             | 19                       | 4.916        |                 |
|                            | <b>Weighted Average</b> | <b>1291</b>                      | <b>12</b>                | <b>8.402</b> |                 |

|                  |                         |             |           |              |      |
|------------------|-------------------------|-------------|-----------|--------------|------|
| 777              | GrM-16816               | 1193        | 16        | 1.000        | Pass |
|                  | GrM-17198               | 1161        | 16        | 1.000        |      |
|                  | <b>Weighted Average</b> | <b>1177</b> | <b>11</b> | <b>2.000</b> |      |
| <b>Sample B2</b> |                         |             |           |              |      |
| 770              | GrM-11849               | 1314        | 17.5      | 1.9          | Pass |
|                  | GrM-12731               | 1286        | 14        | 0.1          |      |
|                  | GrM-12786               | 1276        | 16        | 0.8          |      |
|                  | GrM-14094               | 1290        | 11        | 0.0          |      |
|                  | <b>Weighted Average</b> | <b>1290</b> | <b>7</b>  | <b>2.7</b>   |      |
| 771              | GrM-10567               | 1312        | 22.5      | 2.314        | Pass |
|                  | GrM-11774               | 1267        | 15        | 0.516        |      |
|                  | GrM-12686               | 1250        | 37.5      | 0.548        |      |
|                  | <b>Weighted Average</b> | <b>1278</b> | <b>12</b> | <b>3.378</b> |      |
| 772              | GrM-10568               | 1295        | 22.5      | 0.4          | Pass |
|                  | GrM-12179               | 1286        | 14        | 0.1          |      |
|                  | GrM-12737               | 1266        | 14        | 1.2          |      |
|                  | GrM-12739               | 1271        | 14        | 0.6          |      |
|                  | GrM-14093               | 1292        | 11        | 0.9          |      |
|                  | <b>Weighted Average</b> | <b>1282</b> | <b>6</b>  | <b>3.2</b>   |      |
| 773              | GrM-10569               | 1315        | 22.5      | 0.107        | Pass |
|                  | GrM-13095               | 1312        | 19        | 0.053        |      |
|                  | GrM-13096               | 1298        | 19        | 0.257        |      |
|                  | <b>Weighted Average</b> | <b>1308</b> | <b>12</b> | <b>0.417</b> |      |
| 775              | GrM-10572               | 1205        | 25        | 0.064        | Pass |
|                  | GrM-17405               | 1215        | 19        | 0.037        |      |
|                  | <b>Weighted Average</b> | <b>1211</b> | <b>15</b> | <b>0.101</b> |      |
| 776              | GrM-10574               | 1125        | 25        | 0.469        | Pass |
|                  | GrM-13098               | 1152        | 19        | 0.271        |      |
|                  | <b>Weighted Average</b> | <b>1142</b> | <b>15</b> | <b>0.739</b> |      |
| 777              | GrM-10575               | 1165        | 25        | 0.233        | Pass |
|                  | GrM-14839               | 1148        | 16        | 0.095        |      |
|                  | <b>Weighted Average</b> | <b>1153</b> | <b>13</b> | <b>0.328</b> |      |
| 778              | GrM-10577               | 1170        | 25        | 0.005        | Pass |
|                  | GrM-14440               | 1173        | 15        | 0.102        |      |
|                  | GrM-15240               | 1162        | 16        | 0.150        |      |
|                  | <b>Weighted Average</b> | <b>1168</b> | <b>10</b> | <b>0.258</b> |      |
| 779              | GrM-10578               | 1170        | 25        | 0.065        | Pass |
|                  | GrM-13460               | 1179        | 16        | 0.027        |      |
|                  | <b>Weighted Average</b> | <b>1176</b> | <b>13</b> | <b>0.092</b> |      |
| <b>Sample C</b>  |                         |             |           |              |      |
| 986              | GrM-17190               | 1101        | 16        | 0.001        | Pass |
|                  | GrM-17201               | 1102        | 16        | 0.001        |      |
|                  | <b>Weighted Average</b> | <b>1102</b> | <b>11</b> | <b>0.002</b> |      |
| 989-991          | GrM-17192               | 1105        | 19        | 0.243        | Pass |
|                  | GrM-17202               | 1089        | 16        | 0.172        |      |
|                  | <b>Weighted Average</b> | <b>1096</b> | <b>12</b> | <b>0.415</b> |      |

**Table S3a. Details about averaging of duplicate measurements: T-statistics and Chi-Squared test**

## S4 – ADDITIONAL FIGURES

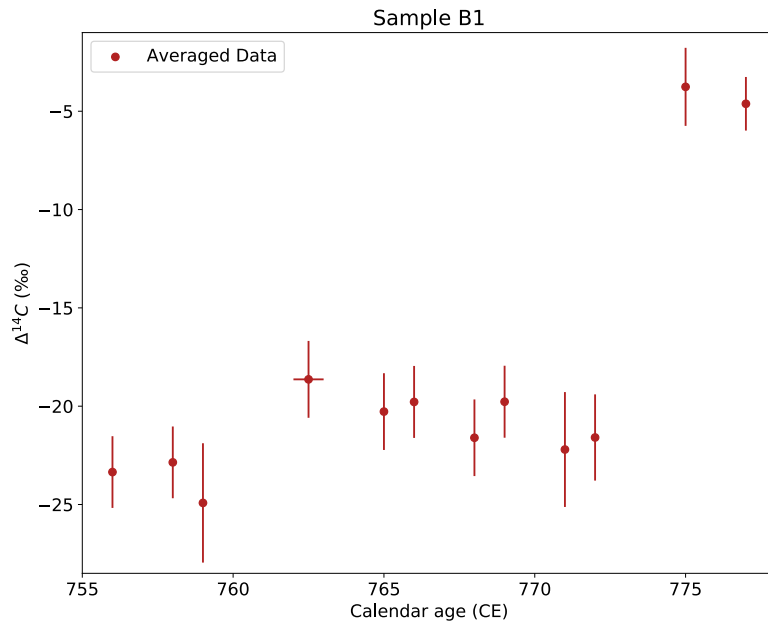

**Figure S4a.** Results of the radiocarbon measurements over sample B1, concerning Event-775. Multiple measurements over the same calendar year have been averaged (see S3), and data points are shown with 1-sigma error bars.

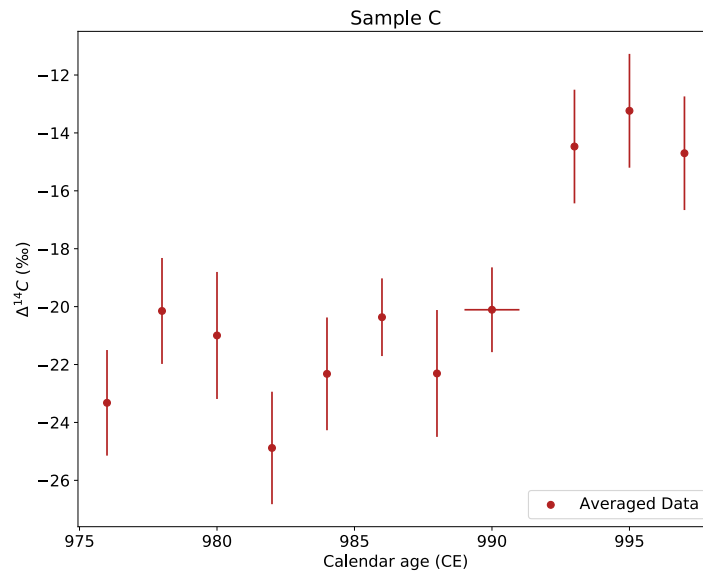

**Figure S4b.** Results of the radiocarbon measurements over sample C, concerning Event-994. Multiple measurements over the same calendar year have been averaged (see S3), and data points are shown with 1-sigma error bars.



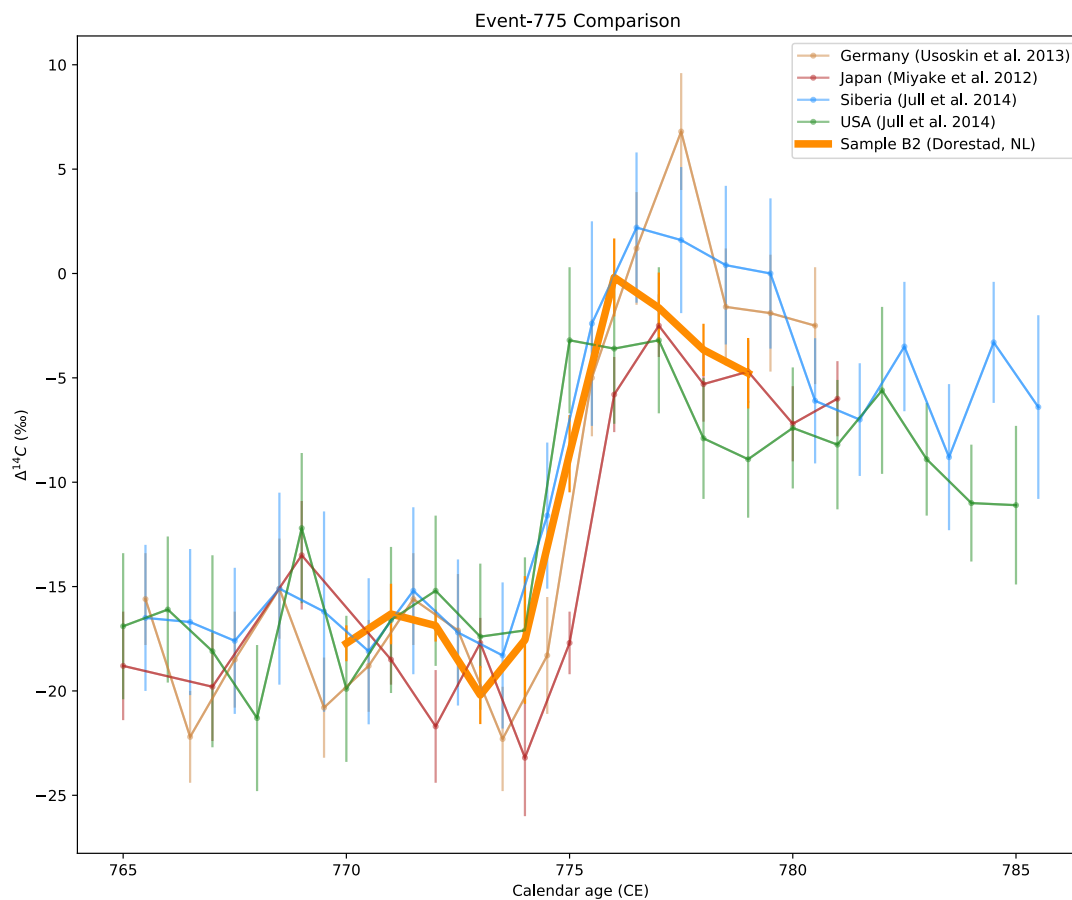

**Figure S4c.** In orange, results of the radiocarbon measurements over sample B2, concerning Event-775. Multiple measurements over the same calendar year have been averaged (see S3), and data points are shown with 1-sigma error bars. In other colors, radiocarbon measurements over the same event, previously published in other studies. Our measurements (in orange) sit perfectly in between the measurements of earlier analysis of other laboratories.

### **S5 – INFO ABOUT SUNSPOT RECORD**

All the data used for the study of the Sunspot Record in conjunction with the Carrington Event, were downloaded, as freely available, from the website of SILSO (Sunspot Index and Long-term Solar Observation) (<http://www.sidc.be/silso/>). SILSO is part of the Solar Influences Data Analysis Center (SIDC), which in turn is part of the Royal Observatory of Belgium and a partner in the Solar Terrestrial Center of Excellence (STCE). The data downloaded and used is the 'daily total sunspot number'.

## **S6 – DENDROCHRONOLOGY**

### **Sample A**

Wood: Oak  
Site: Mapledurham, England  
Dendro-code: MAP71x  
Laboratory: Oxford Dendrochronology Laboratory,  
Daniel Miles, [daniel.miles@arch.ox.ac.uk](mailto:daniel.miles@arch.ox.ac.uk)

### **Sample B1**

Wood: Juniper  
Site: Sierra Nevada Mountains, California  
Dendro-code: CS9d1  
Laboratory: Oxford Dendrochronology Laboratory,  
Daniel Miles, [daniel.miles@arch.ox.ac.uk](mailto:daniel.miles@arch.ox.ac.uk)

### **Sample B2**

Wood: Oak  
Site: Dorestad Haven, The Netherlands  
Project ID: P2016003  
Arch. number: 357-8-38  
Dendro-code: D1600030  
Laboratory: Netherlands Cultural Heritage Agency (Rijksdienst voor het Cultureel Erfgoed),  
Esther Jansma, [E.Jansma@cultureelerfgoed.nl](mailto:E.Jansma@cultureelerfgoed.nl)  
Petra Doeve, [P.Doeve@cultureelerfgoed.nl](mailto:P.Doeve@cultureelerfgoed.nl)

### **Sample C**

Wood: Juniper  
Site: Sierra Nevada Mountains, California  
Dendro-code: CS9d2  
Laboratory: Oxford Dendrochronology Laboratory,  
Daniel Miles, [daniel.miles@arch.ox.ac.uk](mailto:daniel.miles@arch.ox.ac.uk)

### S7 – CUBIC SPLINE INTERPOLATION AND RESIDUALS

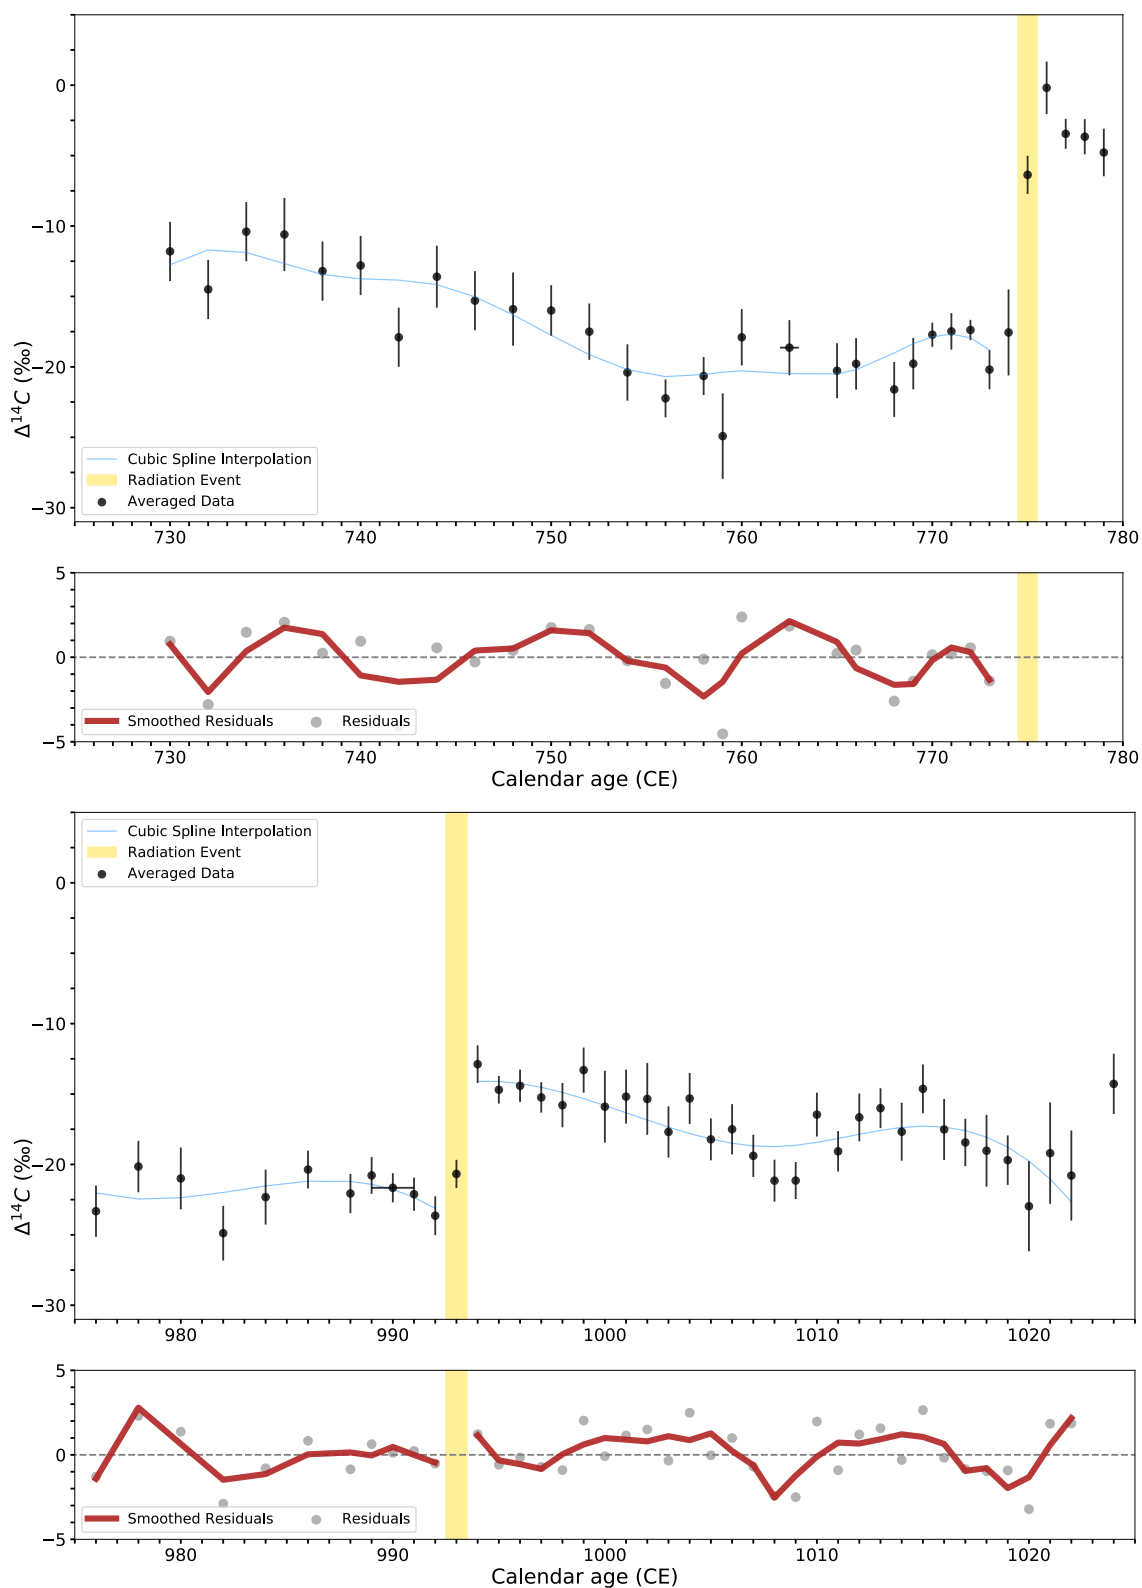

Figure S7a. Results of the analysis over the Event-775 (above) and Event-994 (below). In the top row, averaged data points with 1-sigma error bars (black) and time location of the radiation event (yellow). In the bottom row, residuals of the spline fit (gray dots) and smoothed residuals obtained through a Savitzky-Golay filter (red line).

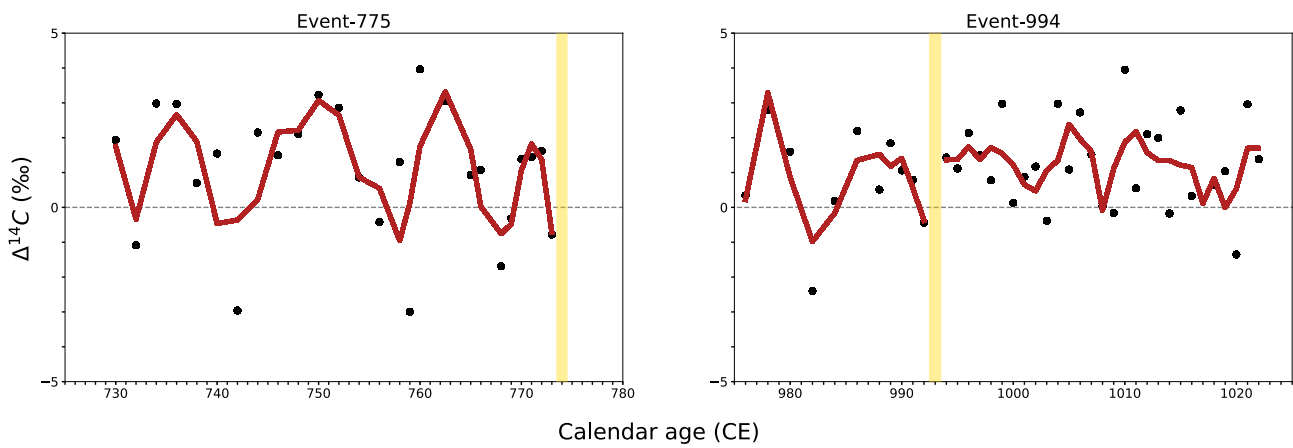

**Figure S7b. Residuals of the cubic spline interpolation (gray dots) and smoothed residuals (red line) over 1,000 times Monte Carlo resampling of the normally distributed experimental data analyzed in Figure 3 and 4. The results over Event-775 is in accordance with the result of the band-pass filter over the same event. The result over Event-994 also coincides with the result of the band-pass filter over the same event, but only in the period before the spike. After the spike, the data is affected by the radiation event and the random resampling disrupts any periodicity.**
